# Supplementary material for: Enhanced photoluminescence and photocatalytic properties in Dy-doped sodium zinc molybdate synthesized via a green microwave-assisted method
Source: Royal Society of Chemistry journal article supplement (doi:10.1039/d5na00047e), 2025-01-01
Supplement: d5na00047e1.pdf [file d5na00047e1.pdf]

## Supplementary information

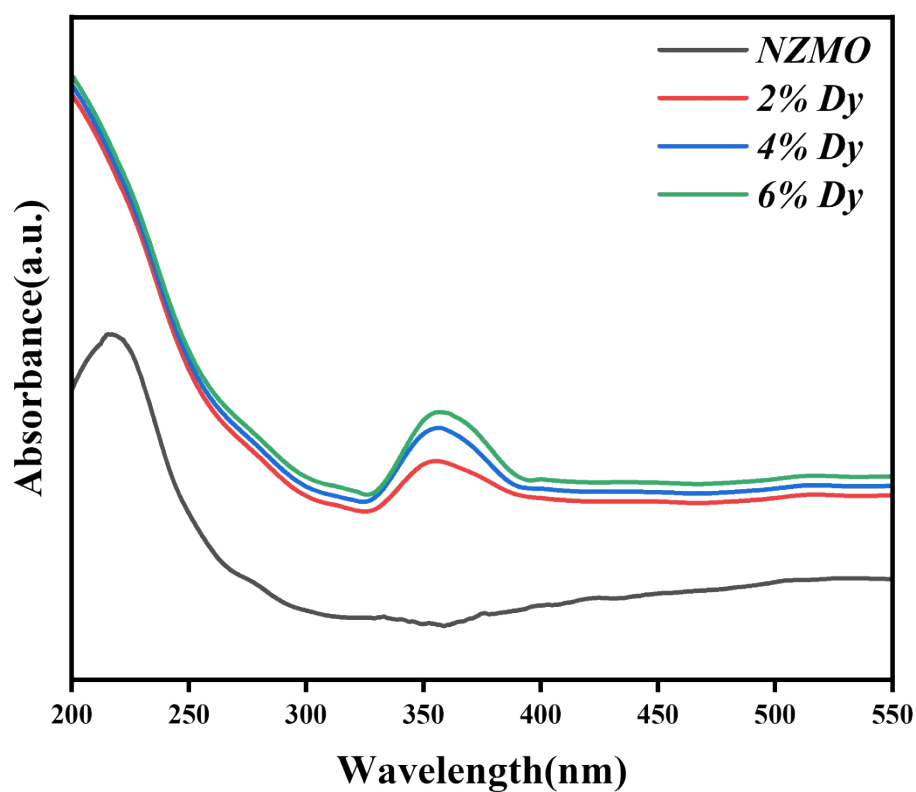

*Figure S1 UV-Vis absorption spectra of NZMO with different Dy doping concentrations*
